# Supplementary figures and images for: Mapping Leaf Area Index at Various Rice Growth Stages in Southern India Using Airborne Hyperspectral Remote Sensing
Source: MDPI journal article supplement (doi:10.3390/rs16060954), 2024-03-08

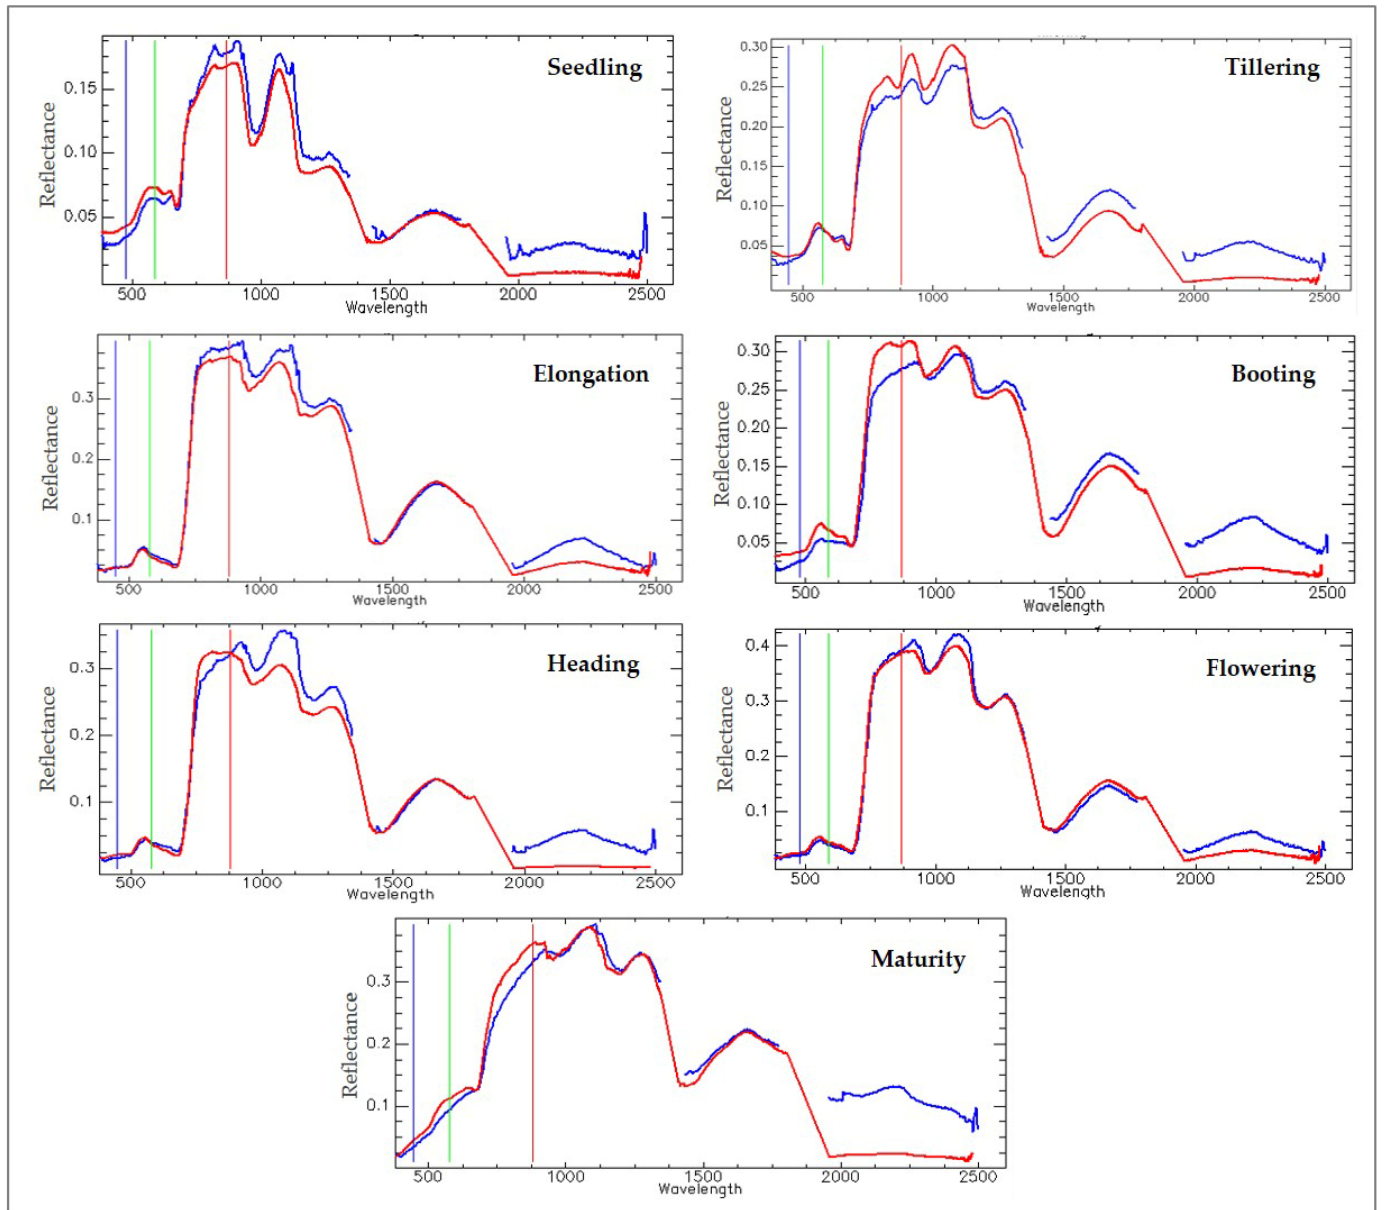

**Figure S1.** Ground-based and AVIRIS-NG image spectral similarity.

Supplement: s1 [file s1]
